# Supplementary material for: The HLA-DRB1*07 Allele Is Associated with Interstitial Lung Abnormalities (ILA) and Subpleural Location in a Mexican Mestizo Population
Source: MDPI journal article supplement (doi:10.3390/biom12111662), 2022-11-09
Supplement: s1 [file s1]

# The HLA-DRB1\*07 Allele Is Associated with Interstitial Lung Abnormalities (ILA) and Subpleural Location in a Mexican Mestizo Population

Ivette Buendia-Roldan, Marco Antonio Ponce-Gallegos, Daniela Lara-Beltrán, Alma D. Del Ángel-Pablo, Gloria Pérez-Rubio, Mayra Mejía, Moises Selman, Ramcés Falfán-Valencia

## Supplementary material

Supplementary Table S1. Demographic and clinical characteristics of ILA subgroups.

| Variables                 | Subpleural     | Central       | <i>p</i> -value |
|---------------------------|----------------|---------------|-----------------|
|                           | (n = 75)       | (n = 15)      |                 |
| <b>Age (years)</b>        | 69 (60-90)     | 72 (58-84)    | 0.498           |
| Sex, female (%)           | 44 (58.66%)    | 8 (53.33%)    | 0.70            |
| <b>Smoking Status</b>     |                |               |                 |
| Smoker, yes (%)           | 44 (58.66)     | 11 (73.33)    | 0.28            |
| Years of smoking          | 20 (1-62)      | 40 (1-64)     | 0.109           |
| Cigarettes per day        | 4 (0-40)       | 4 (0-20)      | 0.891           |
| Tobacco index             | 2 (0-76)       | 10 (0-40)     | 0.401           |
| <b>Comorbidities</b>      |                |               |                 |
| DM                        | 15 (20%)       | 3 (20%)       | 1               |
| HAS                       | 22 (29.33)     | 7 (46.66%)    | 0.18            |
| <b>Pulmonary function</b> |                |               |                 |
| 6MWT                      | 460 (80-600)   | 400 (108-566) | 0.066           |
| Initial SaO2              | 93 (90-99)     | 93 (92-96)    | 0.596           |
| Final SaO2                | 87 (54-96)     | 90 (67-97)    | 0.802           |
| FVC %                     | 94.50 (57-142) | 81 (49-122)   | 0.022           |
| FEV1                      | 100 (68-147)   | 86 (54-115)   | 0.053           |
| FEV1/FVC                  | 79 (61-92)     | 76 (69-89)    | 0.664           |
| DLco/VA                   | 95 (57-144)    | 95 (77-127)   | 0.642           |
| DLco adj                  | 90 (43-116)    | 87 (64-111)   | 0.268           |

Supplementary Table S2. Allele frequency between groups.

| <i>HLA-DR</i> | ILA    |       | HC      |       | <i>p</i> -value | OR  | 95% CI    |
|---------------|--------|-------|---------|-------|-----------------|-----|-----------|
|               | n = 85 | F (%) | n = 220 | F (%) |                 |     |           |
| <i>DR51</i>   | 9      | 10.59 | 29      | 13.18 | 0.54            | 0.8 | 0.35-1.72 |
| <i>DR52</i>   | 26     | 30.59 | 79      | 35.91 | 0.38            | 0.8 | 0.46-1.35 |
| <i>DR53</i>   | 48     | 56.47 | 99      | 45    | 0.07            | 1.6 | 0.96-2.62 |
| <i>DR54</i>   | 2      | 2.35  | 13      | 5.91  | 0.19            | 0.4 | 0.08-1.74 |

Supplementary Table S3. Allele frequency according to ILA HRCT pattern.

| HLA DRB1 | GGA-ILA |       | RO-ILA |       |
|----------|---------|-------|--------|-------|
|          | n = 20  | F (%) | n = 62 | F (%) |
| *01      | 2       | 5     | 10     | 8.06  |
| *03      | 0       | 0     | 11     | 8.87  |
| *04      | 15      | 37.5  | 31     | 25    |
| *07      | 6       | 15    | 12     | 9.68  |
| *08      | 4       | 10    | 19     | 15.32 |
| *09      | 1       | 2.5   | 1      | 0.81  |
| *10      | 0       | 0     | 2      | 1.61  |
| *11      | 4       | 10    | 10     | 8.06  |
| *12      | 0       | 0     | 2      | 1.61  |
| *13      | 0       | 0     | 6      | 4.84  |
| *14      | 1       | 2.5   | 6      | 4.84  |
| *15      | 5       | 12.5  | 5      | 4.03  |
| *16      | 2       | 5.0   | 9      | 7.26  |

Supplementary Table S4. Allele frequency according to GGA-ILA and HC groups.

| HLA DRB1 | GGA-ILA |       | HC      |       |
|----------|---------|-------|---------|-------|
|          | n = 20  | F (%) | n = 189 | F (%) |
| *01      | 2       | 5     | 29      | 7.67  |
| *03      | 0       | 0     | 23      | 6.08  |
| *04      | 15      | 37.5  | 105     | 27.78 |
| *07      | 6       | 15    | 25      | 6.61  |
| *08      | 4       | 10    | 62      | 16.40 |
| *09      | 1       | 2.5   | 4       | 1.06  |
| *10      | 0       | 0     | 4       | 1.06  |
| *11      | 4       | 10    | 24      | 6.35  |
| *12      | 0       | 0     | 3       | 0.79  |
| *13      | 0       | 0     | 20      | 5.29  |
| *14      | 1       | 2.5   | 34      | 8.99  |
| *15      | 5       | 12.5  | 28      | 7.41  |
| *16      | 2       | 5     | 17      | 4.50  |

Supplementary Table S5. Allele frequency according to RO-ILA and HC groups.

| HLA DRB1 | RO-ILA |       | HC      |       |
|----------|--------|-------|---------|-------|
|          | n = 62 | F (%) | n = 189 | F (%) |
| *01      | 10     | 8.06  | 29      | 7.71  |
| *03      | 11     | 8.87  | 23      | 6.12  |
| *04      | 31     | 25    | 105     | 27.93 |
| *07      | 12     | 9.68  | 25      | 6.65  |
| *08      | 19     | 15.32 | 62      | 16.49 |
| *09      | 1      | 0.81  | 4       | 1.06  |
| *10      | 2      | 1.61  | 4       | 1.06  |
| *11      | 10     | 8.06  | 24      | 6.38  |
| *12      | 2      | 1.61  | 3       | 0.8   |
| *13      | 6      | 4.84  | 20      | 5.32  |
| *14      | 6      | 4.84  | 34      | 9.04  |
| *15      | 5      | 4.03  | 28      | 7.45  |
| *16      | 9      | 7.26  | 17      | 4.52  |
